# Supplementary material for: Positional assignment of differentially substituted bisaminoacylated pdCpAs
Source: Royal Society of Chemistry journal article supplement (doi:10.1039/b708786a), 2007-01-01
Supplement: b708786a.pdf [file b708786a.pdf]

## Electronic Supplemental Information

### Positional Assignment of Differentially Substituted Bisaminoacylated pdCpAs<sup>†</sup>

David J. Maloney, Noha Ghanem, Jia Zhou and Sidney M. Hecht

University of Virginia, Departments of Chemistry and Biology

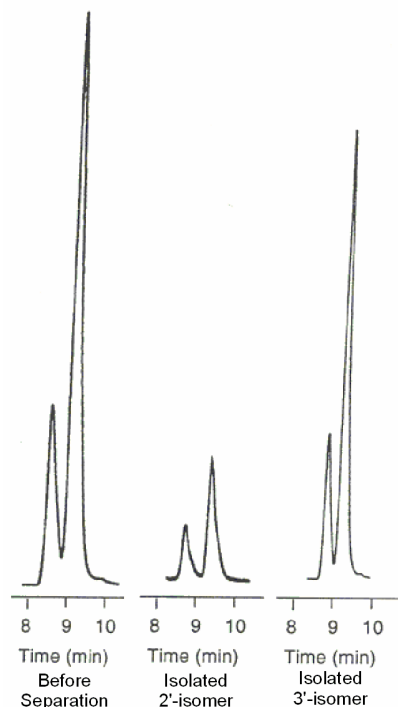

**Figure S1.** Attempted separation of *N*-pentenoylated 2'- and 3'-*O*-valyl-pdCpAs (**2**) by HPLC.

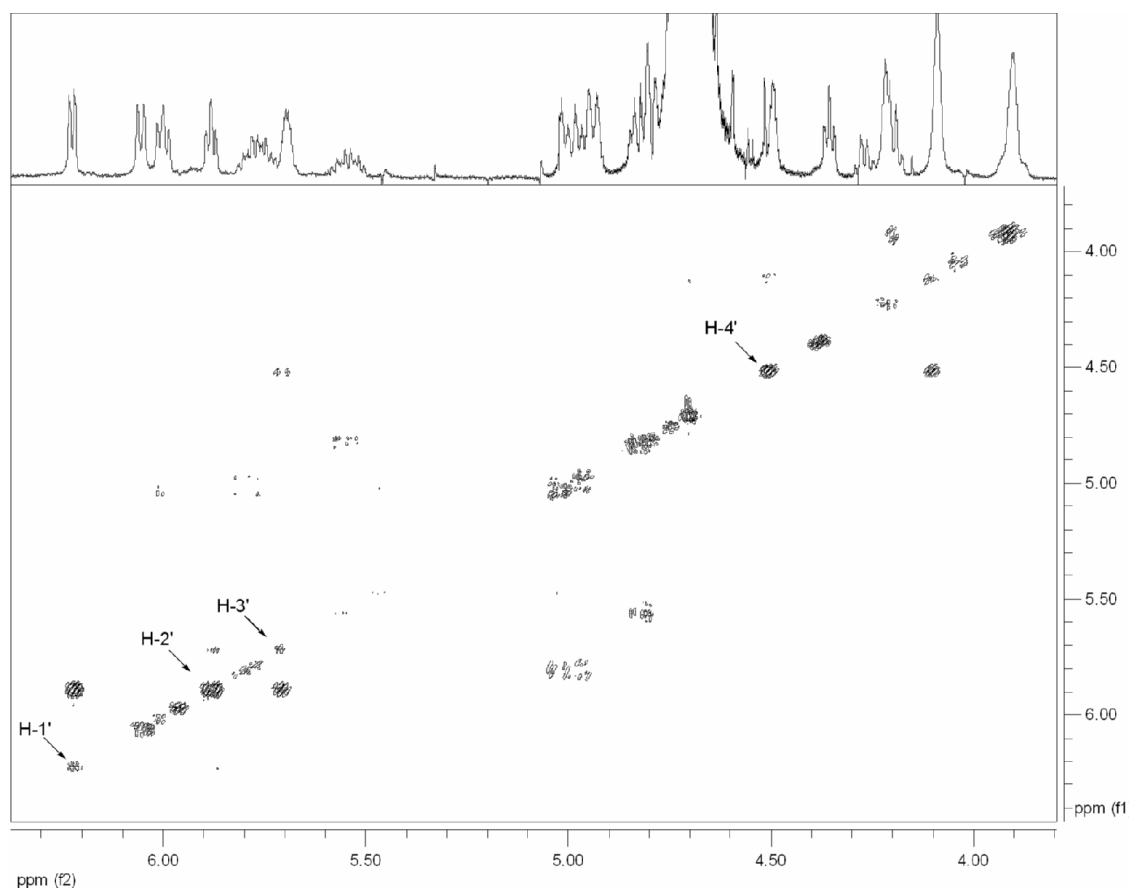

**Figure S2.** gDQCOSY spectrum of 2'-*O*-[*N*-(4-pentenoyl)-(*S*)-alanyl]-3'-*O*-[*N*-(4-pentenoyl)-(*S*)-[1- $^{13}\text{C}$ ]valyl]-pdCpA (6.3 ppm to 3.8 ppm) with  $^1\text{H}$  spectrum shown on horizontal axis.
